# Supplementary material for: Polynuclear lanthanide (Ln) complexes of a tri-functional hydrazone ligand – mononuclear (Dy), dinuclear (Yb, Tm), tetranuclear (Gd), and hexanuclear (Gd, Dy, Tb) examples
Source: Royal Society of Chemistry journal article supplement (doi:10.1039/c3dt32732a), 2013-01-01
Supplement: c3dt32732a.pdf [file c3dt32732a.pdf]

## Supplementary information

### Figure captions

**Fig. S1.**  $M$  vs.  $1/T$  plots for complex **4**.

**Fig. S2.** Zero field  $\chi'$  vs.  $T$  data for complex **4**.

**Fig. S3.** Cole-Cole plot for complex **4**.

**Fig. S4.**  $\chi T$  vs.  $T$  data for complex **5**.

**Fig. S5.**  $\chi T$  vs.  $T$  data for complex **6**.

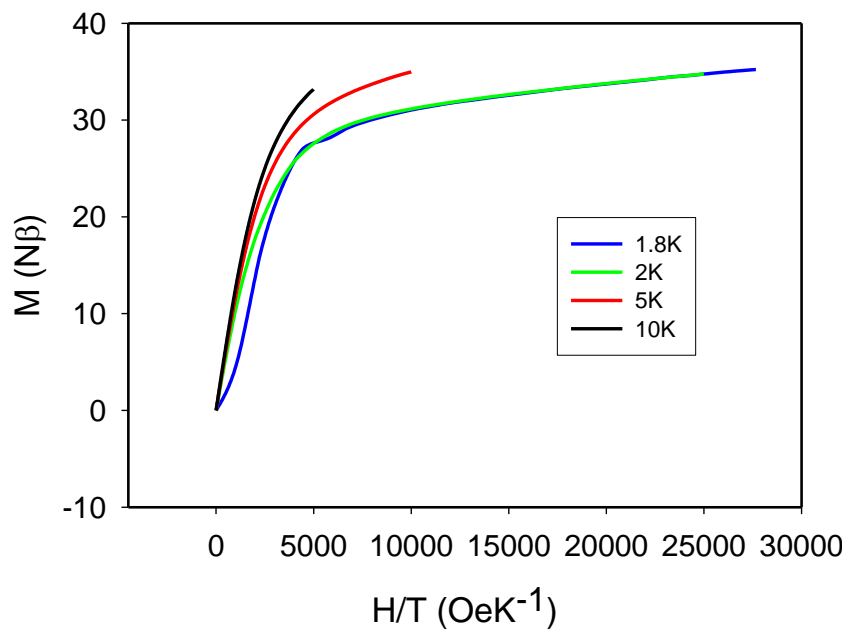

Fig. S1

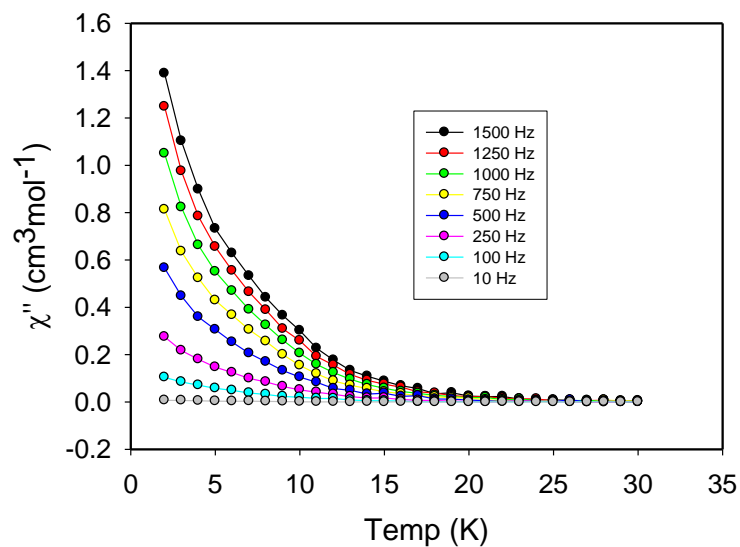

Fig. S2

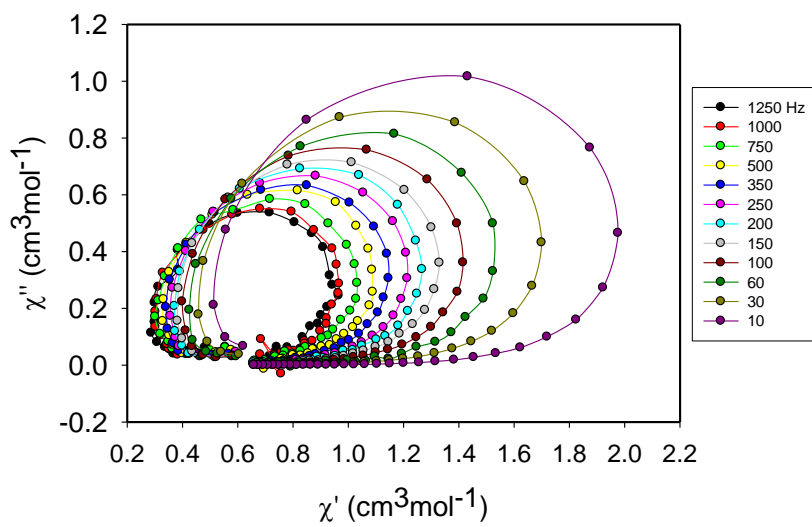

Fig. S3

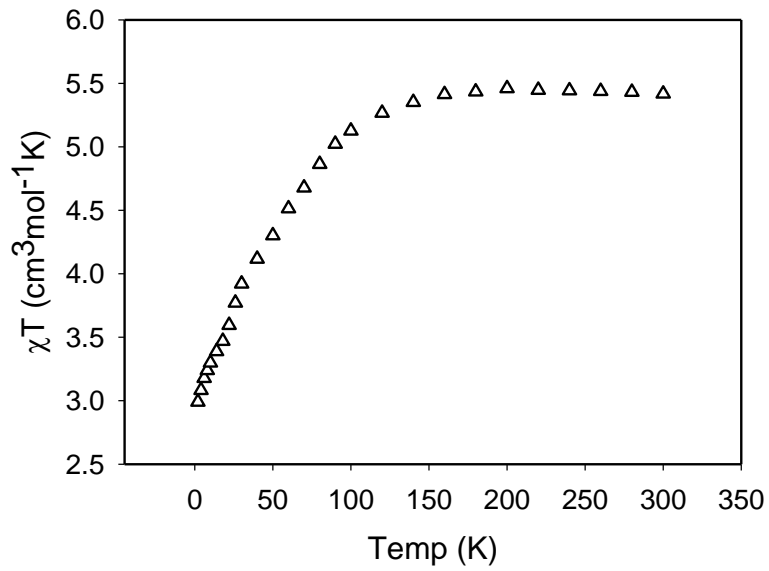

Fig. S4

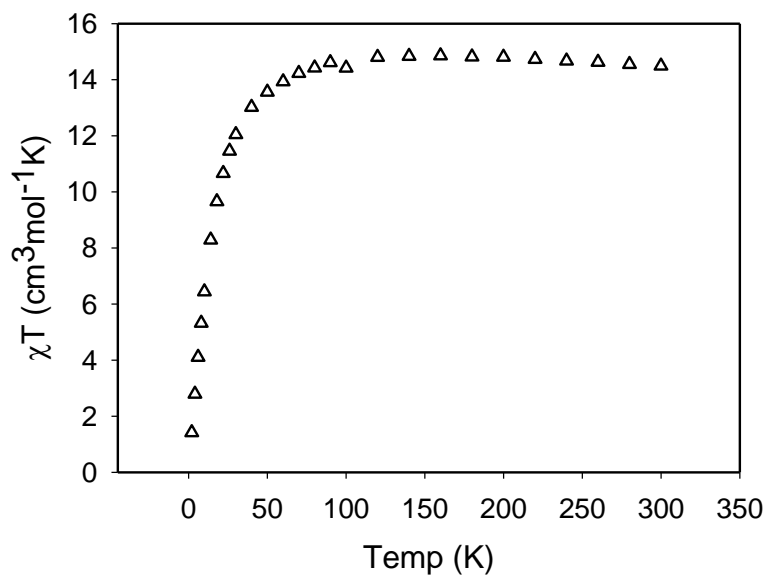

Fig. S5
